# Supplementary material for: Direct imaging of glymphatic transport using H217O MRI
Source: PubMed Central journal article supplement (PMC8262348; doi:10.1172/jci.insight.141159), 2021-05-24
Supplement: jciinsight-6-141159-s028.pdf [file jciinsight-6-141159-s028.pdf]

**Supplemental Table 1.** Physiological parameters of all experimental groups.

| Physiological parameters       |                                          | Pre- infusion | Post- infusion |
|--------------------------------|------------------------------------------|---------------|----------------|
| <i>PaO<sub>2</sub></i> (mmHg)  | H <sub>2</sub> <sup>17</sup> O           | 102.1 ± 25.7  | 125.6 ± 9.6    |
|                                | Gd-DTPA                                  | 94.3 ± 22.1   | 98.7 ± 24      |
|                                | H <sub>2</sub> <sup>17</sup> O (TGN 020) | 119.3 ± 16    | 127.9 ± 19.2   |
|                                | H <sub>2</sub> <sup>17</sup> O (Vehicle) | 157.8 ± 32    | 180.3 ± 40     |
|                                | aCSF                                     | 142.5 ± 67.4  | 161.9 ± 37.2   |
| <i>PaCO<sub>2</sub></i> (mmHg) | H <sub>2</sub> <sup>17</sup> O           | 37.5 ± 9      | 42 ± 9.2       |
|                                | Gd-DTPA                                  | 40.7 ± 10.1   | 41.3 ± 8.9     |
|                                | H <sub>2</sub> <sup>17</sup> O (TGN 020) | 35.4 ± 5.2    | 37.2 ± 9.2     |
|                                | H <sub>2</sub> <sup>17</sup> O (Vehicle) | 33.4 ± 9.3    | 24.7 ± 8       |
|                                | aCSF                                     | 49.1 ± 25.1   | 47.7 ± 23.5    |
| Temp (°C)                      | H <sub>2</sub> <sup>17</sup> O           | 37 ± 0.6      | 37.2 ± 0.5     |
|                                | Gd-DTPA                                  | 36.9 ± 0.7    | 36.7 ± 0.8     |
|                                | H <sub>2</sub> <sup>17</sup> O (TGN 020) | 36.8 ± 0.5    | 36.9 ± 0.5     |
|                                | H <sub>2</sub> <sup>17</sup> O (Vehicle) | 36.8 ± 0.7    | 37 ± 0.2       |
|                                | aCSF                                     | 37.2 ± 0.6    | 37.1 ± 0.5     |
| pH                             | H <sub>2</sub> <sup>17</sup> O           | 7.5 ± 0.06    | 7.5 ± 0.08     |
|                                | Gd-DTPA                                  | 7.5 ± 0.07    | 7.4 ± 0.09     |
|                                | H <sub>2</sub> <sup>17</sup> O (TGN 020) | 7.5 ± 0.04    | 7.5 ± 0.08     |
|                                | H <sub>2</sub> <sup>17</sup> O (Vehicle) | 7.5 ± 0.05    | 7.5 ± 0.04     |
|                                | aCSF                                     | 7.5 ± 0.09    | 7.5 ± 0.1      |

**Abbreviations:** PaCO<sub>2</sub>, partial pressure of carbon dioxide; PaO<sub>2</sub>, partial pressure of oxygen; Temp, temperature. Significant differences denoted by P < 0.05. Data presented as mean ± SD.
